# Supplementary material
Source: MDPI journal article supplement (https://www.mdpi.com/2076-3417/11/16/7283)
Supplement: s1 [file s1]

## ***Supplementary Data***

### **Assessment of pesticide contamination in cereals and legumes by gas-chromatography - mass spectrometry**

Valeria Nardelli<sup>a</sup>, Valeria D'Amico<sup>a</sup>, Mariateresa Ingegno<sup>a</sup>, Ines Della Rovere<sup>a</sup>, Marco Iammarino<sup>a</sup>, Francesco Casamassima<sup>a</sup>, Anna Calitri<sup>a</sup>, Donatella Nardiello<sup>b</sup>, Donghao Li<sup>c</sup>, Maurizio Quinto<sup>b,c,\*</sup>

<sup>a</sup>Istituto Zooprofilattico Sperimentale della Puglia e della Basilicata, Via Manfredonia 20, Foggia 71121, Italy

<sup>b</sup>Dipartimento di Scienze Agrarie, Alimenti, Risorse Naturali e Ingegneria - Università degli Studi di Foggia, Via Napoli, 25 - 71122 Foggia (Italy)

<sup>c</sup>Department of Chemistry, Yanbian University, Park Road 977, Yanji 133002, Jilin Province, China

---

\*Corresponding author. Tel: +39 0881 589102; e-mail address: maurizio.quinto@unifg.it

**Table S1** – Risk exposure by pesticide residues of pirimiphos-methyl, cypermethrin, cyfluthrin, deltamethrin, fenvalerate, and phenothrin in pasta under high exposure scenario

| <b>PASTA*</b>        | <b>Pirimiphos-methyl</b>   |                |              | <b>cypermethrin</b>        |                |              | <b>cyfluthrin</b>          |                |              |
|----------------------|----------------------------|----------------|--------------|----------------------------|----------------|--------------|----------------------------|----------------|--------------|
| <b>Female</b>        | <b>mg die<sup>-1</sup></b> | <b>% NOAEL</b> | <b>% ADI</b> | <b>mg die<sup>-1</sup></b> | <b>% NOAEL</b> | <b>% ADI</b> | <b>mg die<sup>-1</sup></b> | <b>% NOAEL</b> | <b>% ADI</b> |
| <i>Children</i>      | 0.0057                     | 0.0059         | 0.59         | 0.0041                     | 0.0002         | 0.34         | 0.0005                     | < 0.00001      | 0.010        |
| <i>Adolescents</i>   | 0.0055                     | 0.0057         | 0.57         | 0.0039                     | 0.0002         | 0.33         | 0.0005                     | < 0.00001      | 0.010        |
| <i>Adults</i>        | 0.0046                     | 0.0008         | 0.08         | 0.0033                     | < 0.0001       | 0.05         | 0.0004                     | < 0.00001      | 0.002        |
| <i>Elderly</i>       | 0.0049                     | 0.0009         | 0.09         | 0.0035                     | < 0.0001       | 0.05         | 0.0005                     | < 0.00001      | 0.002        |
| <b>Male</b>          | <b>mg die<sup>-1</sup></b> | <b>% NOAEL</b> | <b>% ADI</b> | <b>mg die<sup>-1</sup></b> | <b>% NOAEL</b> | <b>% ADI</b> | <b>mg die<sup>-1</sup></b> | <b>% NOAEL</b> | <b>% ADI</b> |
| <i>Children</i>      | 0.0055                     | 0.0057         | 0.57         | 0.0039                     | 0.0002         | 0.33         | 0.0005                     | < 0.00001      | 0.011        |
| <i>Adolescents</i>   | 0.0061                     | 0.0064         | 0.64         | 0.0044                     | 0.0002         | 0.37         | 0.0006                     | 0.00001        | 0.012        |
| <i>Adults</i>        | 0.0058                     | 0.0010         | 0.10         | 0.0041                     | < 0.0001       | 0.06         | 0.0006                     | < 0.00001      | 0.002        |
| <i>Elderly</i>       | 0.0059                     | 0.0010         | 0.10         | 0.0042                     | < 0.0001       | 0.06         | 0.0006                     | < 0.00001      | 0.002        |
| <b>Male + female</b> | <b>mg die<sup>-1</sup></b> | <b>% NOAEL</b> | <b>% ADI</b> | <b>mg die<sup>-1</sup></b> | <b>% NOAEL</b> | <b>% ADI</b> | <b>mg die<sup>-1</sup></b> | <b>% NOAEL</b> | <b>% ADI</b> |
| <i>Children</i>      | 0.0057                     | 0.0058         | 0.58         | 0.0040                     | 0.0002         | 0.33         | 0.0005                     | < 0.00001      | 0.011        |
| <i>Adolescents</i>   | 0.0058                     | 0.0060         | 0.60         | 0.0041                     | 0.0002         | 0.34         | 0.0006                     | 0.00001        | 0.012        |
| <i>Adults</i>        | 0.0052                     | 0.0009         | 0.10         | 0.0037                     | < 0.0001       | 0.05         | 0.0005                     | < 0.00001      | 0.002        |
| <i>Elderly</i>       | 0.0053                     | 0.0009         | 0.10         | 0.0038                     | < 0.0001       | 0.05         | 0.0005                     | < 0.00001      | 0.002        |

\* Source: INRAN-SCAI 2005-06. [https://www.crea.gov.it/documents/59764/0/appendice\\_1b2\\_cereali.pdf/1439e069-bdc2-2375-e4eb-8204cad664cf?t=1550823135003](https://www.crea.gov.it/documents/59764/0/appendice_1b2_cereali.pdf/1439e069-bdc2-2375-e4eb-8204cad664cf?t=1550823135003)

| <b>PASTA*</b>        | <b>deltamethrin</b>        |                |              | <b>fenvalerate</b>         |                |              | <b>phenothrin</b>          |                |              |
|----------------------|----------------------------|----------------|--------------|----------------------------|----------------|--------------|----------------------------|----------------|--------------|
| <b>Female</b>        | <b>mg die<sup>-1</sup></b> | <b>% NOAEL</b> | <b>% ADI</b> | <b>mg die<sup>-1</sup></b> | <b>% NOAEL</b> | <b>% ADI</b> | <b>mg die<sup>-1</sup></b> | <b>% NOAEL</b> | <b>% ADI</b> |
| <i>Children</i>      | 0.0009                     | 0.00001        | 0.038        | 0.0009                     | 0.00016        | 0.021        | 0.0006                     | 0.00003        | 0.0034       |
| <i>Adolescents</i>   | 0.0009                     | 0.00001        | 0.036        | 0.0009                     | 0.00016        | 0.021        | 0.0006                     | 0.00003        | 0.0033       |
| <i>Adults</i>        | 0.0007                     | < 0.00001      | 0.005        | 0.0007                     | 0.00002        | 0.003        | 0.0005                     | < 0.00001      | 0.0005       |
| <i>Elderly</i>       | 0.0008                     | < 0.00001      | 0.006        | 0.0008                     | 0.00002        | 0.003        | 0.0006                     | < 0.00001      | 0.0005       |
| <b>Male</b>          | <b>mg die<sup>-1</sup></b> | <b>% NOAEL</b> | <b>% ADI</b> | <b>mg die<sup>-1</sup></b> | <b>% NOAEL</b> | <b>% ADI</b> | <b>mg die<sup>-1</sup></b> | <b>% NOAEL</b> | <b>% ADI</b> |
| <i>Children</i>      | 0.0009                     | 0.00001        | 0.036        | 0.0009                     | 0.00016        | 0.021        | 0.0006                     | 0.00003        | 0.0033       |
| <i>Adolescents</i>   | 0.0010                     | 0.00001        | 0.041        | 0.0010                     | 0.00018        | 0.023        | 0.0006                     | 0.00004        | 0.0037       |
| <i>Adults</i>        | 0.0009                     | < 0.00001      | 0.007        | 0.0009                     | 0.00003        | 0.004        | 0.0007                     | < 0.00001      | 0.0006       |
| <i>Elderly</i>       | 0.0009                     | < 0.00001      | 0.007        | 0.0009                     | 0.00003        | 0.004        | 0.0007                     | < 0.00001      | 0.0006       |
| <b>Male + female</b> | <b>mg die<sup>-1</sup></b> | <b>% NOAEL</b> | <b>% ADI</b> | <b>mg die<sup>-1</sup></b> | <b>% NOAEL</b> | <b>% ADI</b> | <b>mg die<sup>-1</sup></b> | <b>% NOAEL</b> | <b>% ADI</b> |
| <i>Children</i>      | 0.0009                     | 0.00001        | 0.037        | 0.0009                     | 0.00016        | 0.021        | 0.0006                     | 0.00003        | 0.0033       |
| <i>Adolescents</i>   | 0.0009                     | 0.00001        | 0.038        | 0.0009                     | 0.00017        | 0.022        | 0.0007                     | 0.00004        | 0.0035       |
| <i>Adults</i>        | 0.0008                     | < 0.00001      | 0.006        | 0.0008                     | 0.00003        | 0.003        | 0.0006                     | < 0.00001      | 0.0005       |
| <i>Elderly</i>       | 0.0008                     | < 0.00001      | 0.006        | 0.0008                     | 0.00003        | 0.003        | 0.0006                     | < 0.00001      | 0.0005       |

\* Source: INRAN-SCAI 2005-06. [https://www.crea.gov.it/documents/59764/0/appendice\\_1b2\\_cereali.pdf/1439e069-bdc2-2375-e4eb-8204cad664cf?t=1550823135003](https://www.crea.gov.it/documents/59764/0/appendice_1b2_cereali.pdf/1439e069-bdc2-2375-e4eb-8204cad664cf?t=1550823135003)

**Table S2** – Risk exposure by pesticide residues of pirimiphos-methyl and chlorpyrifos in bread under high exposure scenario

| <b>BREAD*</b>        | <b>pirimiphos-methyl</b>   |                |              | <b>chlorpyrifos</b>        |                |              |
|----------------------|----------------------------|----------------|--------------|----------------------------|----------------|--------------|
| <b>Female</b>        | <b>mg die<sup>-1</sup></b> | <b>% NOAEL</b> | <b>% ADI</b> | <b>mg die<sup>-1</sup></b> | <b>% NOAEL</b> | <b>% ADI</b> |
| <i>Children</i>      | 0.0042                     | 0.0040         | 0.40         | 0.0012                     | 0.0050         | 0.0083       |
| <i>Adolescents</i>   | 0.0051                     | 0.0053         | 0.53         | 0.0014                     | 0.0060         | 0.0097       |
| <i>Adults</i>        | 0.0052                     | 0.0009         | 0.09         | 0.0015                     | 0.0011         | 0.0018       |
| <i>Elderly</i>       | 0.0061                     | 0.0011         | 0.11         | 0.0017                     | 0.0012         | 0.0020       |
| <b>Male</b>          | <b>mg die<sup>-1</sup></b> | <b>% NOAEL</b> | <b>% ADI</b> | <b>mg die<sup>-1</sup></b> | <b>% NOAEL</b> | <b>% ADI</b> |
| <i>Children</i>      | 0.0046                     | 0.0048         | 0.48         | 0.0013                     | 0.0054         | 0.0090       |
| <i>Adolescents</i>   | 0.0073                     | 0.0076         | 0.76         | 0.0021                     | 0.0086         | 0.0146       |
| <i>Adults</i>        | 0.0076                     | 0.0011         | 0.14         | 0.0022                     | 0.0015         | 0.0024       |
| <i>Elderly</i>       | 0.0083                     | 0.0015         | 0.15         | 0.0023                     | 0.0017         | 0.0027       |
| <b>Male + female</b> | <b>mg die<sup>-1</sup></b> | <b>% NOAEL</b> | <b>% ADI</b> | <b>mg die<sup>-1</sup></b> | <b>% NOAEL</b> | <b>% ADI</b> |
| <i>Children</i>      | 0.0044                     | 0.0046         | 0.46         | 0.0013                     | 0.0052         | 0.0090       |
| <i>Adolescents</i>   | 0.0061                     | 0.0063         | 0.63         | 0.0017                     | 0.0071         | 0.0119       |
| <i>Adults</i>        | 0.0063                     | 0.0011         | 0.11         | 0.0018                     | 0.0013         | 0.0021       |
| <i>Elderly</i>       | 0.0070                     | 0.0012         | 0.20         | 0.0020                     | 0.0014         | 0.0024       |

\* Source: INRAN-SCAI 2005-06. [https://www.crea.gov.it/documents/59764/0/appendice\\_1b2\\_cereali.pdf/1439e069-bdc2-2375-e4eb-8204cad664cf?t=1550823135003](https://www.crea.gov.it/documents/59764/0/appendice_1b2_cereali.pdf/1439e069-bdc2-2375-e4eb-8204cad664cf?t=1550823135003)

**Table S3** – Risk exposure by pesticide residues of pirimiphos-methyl in breakfast cereals under high exposure scenario

| <b>BREAKFAST CEREALS*</b> | <b>pirimiphos-methyl</b>   |                |              |
|---------------------------|----------------------------|----------------|--------------|
| <b>Female</b>             | <b>mg die<sup>-1</sup></b> | <b>% NOAEL</b> | <b>% ADI</b> |
| <i>Children</i>           | 0.00005                    | 0.00006        | 0.0056       |
| <i>Adolescents</i>        | 0.00004                    | 0.00004        | 0.0038       |
| <i>Adults</i>             | 0.00004                    | < 0.00001      | 0.0006       |
| <i>Elderly</i>            | 0.00002                    | < 0.00001      | 0.0003       |
| <b>Male</b>               | <b>mg die<sup>-1</sup></b> | <b>% NOAEL</b> | <b>% ADI</b> |
| <i>Children</i>           | 0.00007                    | 0.00008        | 0.0075       |
| <i>Adolescents</i>        | 0.00007                    | 0.00008        | 0.0075       |
| <i>Adults</i>             | 0.00002                    | < 0.00001      | 0.0003       |
| <i>Elderly</i>            | 0.00002                    | < 0.00001      | 0.0003       |
| <b>Male + female</b>      | <b>mg die<sup>-1</sup></b> | <b>% NOAEL</b> | <b>% ADI</b> |
| <i>Children</i>           | 0.00007                    | 0.00008        | 0.0075       |
| <i>Adolescents</i>        | 0.00005                    | 0.00006        | 0.0056       |
| <i>Adults</i>             | 0.00002                    | < 0.00001      | 0.0003       |
| <i>Elderly</i>            | 0.00002                    | < 0.00001      | 0.0003       |

\* Source: INRAN-SCAI 2005-06. [https://www.crea.gov.it/documents/59764/0/appendice\\_1b2\\_cereali.pdf/1439e069-bdc2-2375-e4eb-8204cad664cf?t=1550823135003](https://www.crea.gov.it/documents/59764/0/appendice_1b2_cereali.pdf/1439e069-bdc2-2375-e4eb-8204cad664cf?t=1550823135003)
